# Supplementary material for: A platinum catalyst deposited on a zirconia support for the design of lithium–oxygen batteries with enhanced cycling ability
Source: Royal Society of Chemistry journal article supplement (doi:10.1039/c7cc05459a), 2017-01-01
Supplement: c7cc05459a1.pdf [file c7cc05459a1.pdf]

Electronic Supplementary Information

Platinum catalyst deposited on zirconia support  
for the design of lithium-oxygen battery  
with enhanced cycling ability

*Seongjun Bae,<sup>a,b</sup> Young Geun Yoo,<sup>a,b</sup> Jongseok Park,<sup>a,b</sup> Soomin Park,<sup>a,b</sup> Inho Nam,<sup>a,b</sup> Jeong  
Woo Han,<sup>c</sup> and Jongheop Yi<sup>a,b,\*</sup>*

<sup>a</sup>School of Chemical and Biological Engineering, Seoul National University, Seoul 151-742,  
Republic of Korea

<sup>b</sup>World Class University (WCU) Program of Chemical Convergence for Energy &  
Environment (C2E2), Institute of Chemical Processes, Seoul National University, Seoul 151-  
742, Republic of Korea

<sup>c</sup>Department of Chemical Engineering, University of Seoul, Seoul 130-743, Republic of  
Korea

\*corresponding author

## Experimental Details

**Preparation of platinum deposited onto a zirconia support (Pt/ZrO<sub>2</sub>)** 10 wt% of platinum precursor (H<sub>2</sub>PtCl<sub>6</sub>·6H<sub>2</sub>O, Sigma-Aldrich) was added to 0.05 g ZrO<sub>2</sub> (Sigma-Aldrich) in distilled water (100 ml). The solution was stirred for 1 h and sonicated for 1 h. A NaBH<sub>4</sub> solution (0.15g, 50ml, Sigma-Aldrich) was slowly added drop-wise to the sample solution to reduce the platinum. The solution was aged for 12 h and washed with distilled water. The sample was dried in a 60 °C oven for 12 h. Commercial platinum black (Alfa Aesar) was used for the platinum catalyst for comparison.

**Characterization** The morphology and surface properties were measured by transmitted electron microscopy (TEM, JEOL, JEM-2100), X-ray diffraction (XRD, Rigaku, D/max-2200), BET analysis (Micrometrics, ASAP2010) and X-ray spectroscopy (XPS, Thermo Scientific, Sigma Probe)

**Electrochemical characterization** The Swagelok-type Li-O<sub>2</sub> cells were assembled using lithium metal as an anode, 1 M Bis(trifluoromethane) sulfonamide lithium salt (Sigma-Aldrich) dissolved in tetraethylene glycol dimethyl ether (Sigma-Aldrich) was used as an electrolyte and gas-diffusion layer (SGL carbon, GDL 10BC) with the catalyst as a cathode. All cells were fabricated in an argon-filled glove box. Catalysts were applied via a spray gun using catalyst ink. 10 mg of catalyst was added into 5 ml 2-propanol (SAMCHUN chemicals) for catalyst ink. The amount of loaded Pt/ZrO<sub>2</sub> was 0.5 mg cm<sup>-2</sup>. To equalize the amount of active material without support, the mass density of Pt particle electrode was adjusted to 0.05 mg cm<sup>-2</sup>. Before the electrochemical characterization, cells were transferred to an oxygen-filled chamber. Charge/discharge tests were conducted with a multichannel automatic battery cycler (WonATech, WBCS3000). Cyclic voltammetry and galvanostatic tests were carried out using a potentiostat (WonATech, ZIVE 2). In galvanostatic reduction/oxidation test, a three-electrode configuration was used with a glassy carbon electrode with a diameter of 5 mm as the working electrode and platinum meshes as counter and pseudo-reference electrodes. Seven μl of catalyst ink was fabricated by mixing 10 mg catalyst, 5 mg Nafion (NanoBest Corp.) and 0.8 ml 2-propanol, which was dropped onto a glassy carbon and dried. 0.5 M tetrabutylammonium perchlorate (Sigma-Aldrich) dissolved in dimethyl sulfoxide (SAMCHUN chemicals) was used for the electrolyte and O<sub>2</sub> purge for 1h before the test.

**Computational Details** Periodic DFT calculations were conducted using a Vienna ab initio simulation package (VASP). Perdew-Burke-Ernzerhof (PBE) exchange-correlation functional was applied to a generalized gradient approximation (GGA).<sup>1,2</sup> Ionic cores were calculated under the projector augmented wave (PAW) method.<sup>3</sup> The

energy cutoff for the plane wave basis was 520 eV. A Brillouin zone was described by  $1 \times 1 \times 1$  Monkhorst-Pack k-point mesh. DFT+U calculation was introduced with  $U_{\text{eff}} = 4$  eV for zirconium. This U value was obtained from the construction of electronic and geometric structures of bulk zirconia.<sup>4</sup> This  $U_{\text{eff}}$  is also used to calculate the stability of zirconia nanoparticle with various shapes.<sup>5</sup> The van der Waals interactions are described using a DFT+D2 method established by Grimme. The source of the parameters for Grimme's potential was studies by F. Picaud<sup>6</sup> and G. Kresse.<sup>7</sup>

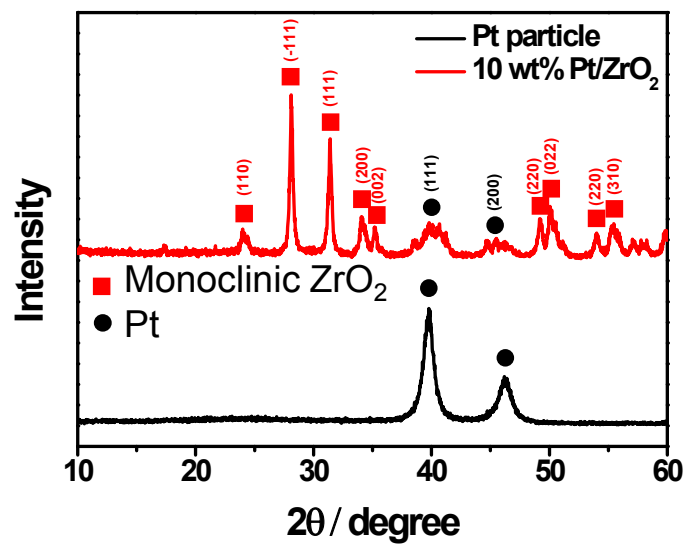

Figure S1. XRD patterns of Pt/ZrO<sub>2</sub> and Pt particle

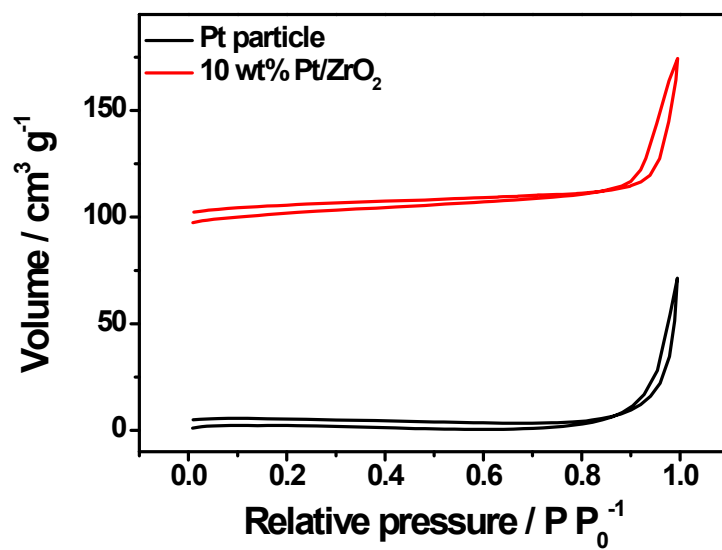

**Figure S2.** N<sub>2</sub> adsorption-desorption isotherms of Pt particle and Pt/ZrO<sub>2</sub>

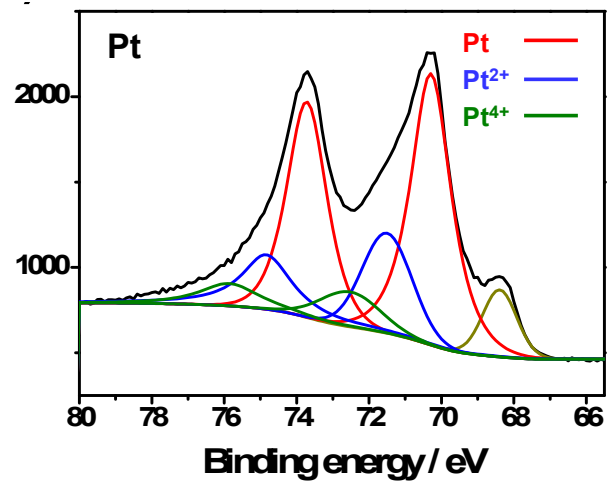

Figure S3. XPS analysis of Pt/4f of Pt/ZrO<sub>2</sub>. Olive line is background.

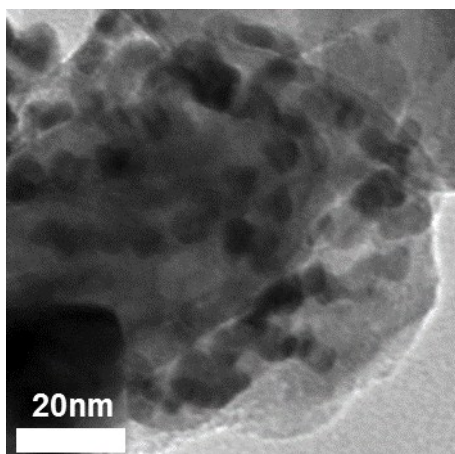

**Figure S4.** TEM image of 20 wt% Pt/ZrO<sub>2</sub>

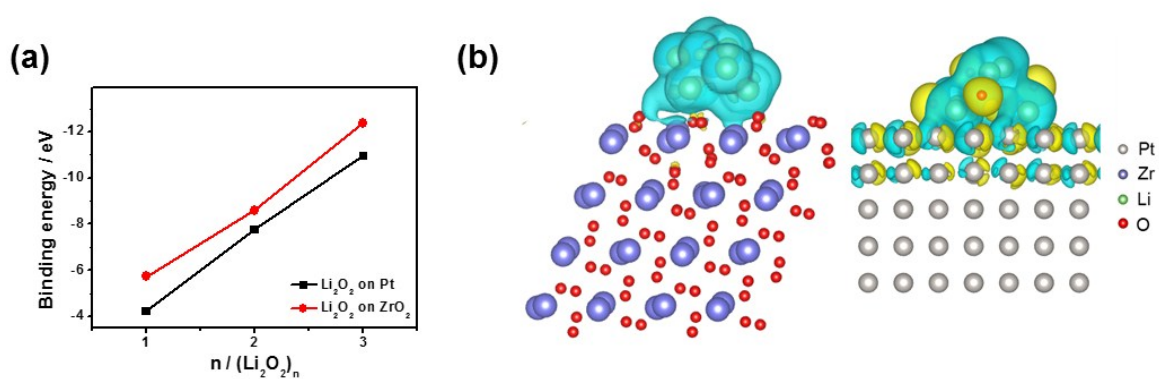

**Figure S5.** Calculated binding energy of  $(\text{Li}_2\text{O}_2)_n$  ( $n = 1,2,3$ ) adsorbed on platinum (200) and zirconia (111) planes. Binding energy calculated by  $E_{\text{Li}_2\text{O}_2} + E_{\text{surface}} - E_{\text{ad}}$ .  $E_{\text{Li}_2\text{O}_2}$  is energy of  $\text{Li}_2\text{O}_2$  monomer, dimer and trimer,  $E_{\text{surface}}$  is energy of clean surface of Pt and  $\text{ZrO}_2$  and  $E_{\text{ad}}$  is energy of  $\text{Li}_2\text{O}_2$  adsorbed on Pt and  $\text{ZrO}_2$ . (b) Charge density difference of  $\text{Li}_2\text{O}_2$  adsorbed on Pt and  $\text{ZrO}_2$ . The isosurfaces are  $0.01 \text{ e a}_0^{-3}$  and plotted at positive (yellow) and negative (blue) values.



## References

1. G. Kresse, J. Furthmuller, *Phys. Rev. B: Condens. Matter Mater. Phys.*, 1996, **54**, 11169-11186.
2. J. P. Perdew, K. Burke, M. Ernzerhof, *Phys. Rev. Lett.*, 1996, **77**, 3865-3868.
3. P. E. Blochl, *Phys. Rev. B: Condens. Matter Mater. Phys.*, 1994, **50**, 17953-17979.
4. O. A. Syzgantseva, M. Calatayud, C. Minot, *J. Phys. Chem. C*, 2012, **116**, 6636-6644.
5. A. R. Puigdollers, F. Illas, G. Pacchioni, *J. Phys. Chem. C*, 2016, **120**, 4392-4402.
6. E. Duverger, T. Gharbi, E. Delabrousse, F. Picaud, *Phys. Chem. Chem. Phys.*, 2014, **16**, 18425-18432.
7. J. Harl, L. Schimka, G. Kresse, *Phys. Rev. B*, 2010, **81**, 115126.
